# Supplementary material for: Isotopic constraints on heterogeneous sulfate production in Beijing haze
Source: Copernicus journal article supplement (doi:10.5194/acp-18-5515-2018), 2018-04-23
Supplement: Supplementary file 1 [file acp-18-5515-2018-supplement.zip]

Archive with 3 entries (3 files):
- Supplementary Information.docx
- acp-18-5515-2018-supplement-title-page.pdf
- Data.xlsx
