# Supplementary material for: Isotopic constraints on heterogeneous sulfate production in Beijing haze
Source: Copernicus journal article supplement (doi:10.5194/acp-18-5515-2018), 2018-04-23
Supplement: Supplementary file 1 [file acp-18-5515-2018-supplement.zip › acp-18-5515-2018-supplement-title-page.pdf]

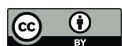

*Supplement of*

## **Isotopic constraints on heterogeneous sulfate production in Beijing haze**

**P. He et al.**

*Correspondence to:* Zhouqing Xie (zqxie@ustc.edu.cn)

- [acp-18-5515-2018-supplement-title-page.pdf](#)
- [Data.xlsx](#)
- [Supplementary Information.docx](#)

The copyright of individual parts of the supplement might differ from the CC BY 4.0 License.
