# Supplementary material for: Isotopic constraints on heterogeneous sulfate production in Beijing haze
Source: Copernicus journal article supplement (doi:10.5194/acp-18-5515-2018), 2018-04-23
Supplement: Supplementary file 1 [file acp-18-5515-2018-supplement.zip › Data.xlsx]

## Sheet: Data in fig01
Start time, LT	PM2.5 (μg/m3)	SO4 (μg/m3)	SOR	Δ17O(SO4) (‰)	SD	O3 nmol/mol	Calculated H2O2 nmol/mol
2014-10-18 08:00:00	86	10.8	0.25	1.2	0.2	58	0.52
2014-10-18 20:00:00	215	30.5	0.41	1.6	0.1	43	0.32
2014-10-19 08:00:00	228	37.8	0.38	1	0.1	29	0.46
2014-10-19 20:00:00	138	28.5	0.53	1.1	0.1	9	0.33
2014-10-20 08:00:00	177	35.8	0.58	1	0.1	34	0.38
2014-10-20 20:00:00	83	9.8	0.21	0.9	0.2	9	0.31
2014-10-21 08:00:00	45	4.6	0.1	0.8	0.2	9	0.3
2014-10-21 20:00:00	41	4.1	0.15	0.6	0	5	0.2
2014-10-22 08:00:00	62	6.6	0.17	0.9	0	5	0.27
2014-10-22 20:00:00	82	8.2	0.24	0.7	0.1	5	0.27
2014-10-23 08:00:00	122	23.9	0.39	1.1	0.3	20	0.33
2014-10-23 20:00:00	138	29	0.55	0.9	0.2	14	0.22
2014-10-24 08:00:00	214	51.7	0.62	1.4	0.4	40	0.35
2014-10-24 20:00:00	184	46.2	0.73	1.3	0.2	15	0.24
2014-10-25 08:00:00	257	56.4	0.71	1.1	0.1	44	0.37
2014-10-25 20:00:00	210	31.5	0.67	1.1	0.1	22	0.29
2014-11-17 20:00:00	24	2.5	0.11	1	0.3	10	0.13
2014-11-18 08:00:00	34	5	0.13	0.9	0.1	24	0.25
2014-11-19 08:00:00	174	21.4	0.21	0.8	0.2	7	0.19
2014-11-19 20:00:00	205	30.1	0.34	0.8	0.2	3	0.16
2014-11-20 08:00:00	244	34.6	0.38	0.8	0.2	9	0.19
2014-11-20 20:00:00	207	22.8	0.46	0.9	0.1	2	0.14
2014-12-08 08:00:00	31	3.1	0.09	0.9	0.2	23	0.12
2014-12-08 20:00:00	68	6.6	0.15	1	0.1	3	0.08
2014-12-09 08:00:00	154	21.6	0.14	0.3	0.1	5	0.1
2014-12-09 20:00:00	260	34.6	0.33	0.1	0.1	2	0.1
2014-12-10 08:00:00	109	11.1	0.28	0.3	0	27	0.12
2014-12-10 20:00:00	16	1.5	0.07	1	0.1	26	0.08
2015-01-14 08:00:00	153	17.8	0.23	0.7	0	4	0.1
2015-01-14 20:00:00	209	22.5	0.35	0.5	0.1	4	0.08
2015-01-15 08:00:00	271	32.6	0.34	0.6	0.1	6	0.1
2015-01-15 20:00:00	323	31.8	0.54	0.5	0.1	4	0.08
2015-01-16 08:00:00	21	3.3	0.18	0.8	0.2	32	0.12
2015-01-16 20:00:00	21	1.8	0.07	0.9	0.1	23	0.08

## Sheet: Data in fig04
Start time, LT	PM2.5 (μg/m3)	SO4 (μg/m3)	Phet (μg/m3/h)	Pcloud (μg/m3/h)	PSO2+OH (μg/m3/h)	Primary SO4 (μg/m3)	Phet+Pcloud+PSO2+OH (μg/m3/h)		PD of case	fp (%)	fhet (%)	fcloud (%)	fSO2+OH (%)
2014-10-18 08:00:00	86	10.8	0.92	0	0.37	1.9	1.29		I	8.87728	53.8788	29.182	8.06195
2014-10-18 20:00:00	215	30.5	2.48	0.05	0	2.6	2.53
2014-10-19 08:00:00	228	37.8	2.37	0.5	0.74	3.4	3.61
2014-10-19 20:00:00	138	28.5	1.33	4.59	0	1.7	5.92
2014-10-20 08:00:00	177	35.8	1.35	0	0.31	2.1	1.66
2014-10-20 20:00:00	83	9.8	1.04	0	0	1.9	1.04
2014-10-21 08:00:00	45	4.6	0.95	0	0.74	2.3	1.69
2014-10-21 20:00:00	41	4.1	0.59	0	0	1.8	0.59
2014-10-22 08:00:00	62	6.6	0.89	0.2	0.56	1.7	1.65
2014-10-22 20:00:00	82	8.2	0.95	6.65	0	1.3	7.6		II	5.95383	22.5247	68.4574	3.06402
2014-10-23 08:00:00	122	23.9	1.25	1.44	0.45	2.2	3.14
2014-10-23 20:00:00	138	29	1.35	11.86	0	1.9	13.21
2014-10-24 08:00:00	214	51.7	1.53	0.56	0.39	2.8	2.48
2014-10-24 20:00:00	184	46.2	1.08	4.01	0	2	5.09
2014-10-25 08:00:00	257	56.4	1.18	0.28	0.27	2.6	1.73
2014-10-25 20:00:00	210	31.5	0.82	0	0	1.9	0.82
2014-11-17 20:00:00	24	2.5	0.32	0	0	1.7	0.32
2014-11-18 08:00:00	34	5	0.65	0	0.12	2.2	0.77
2014-11-19 08:00:00	174	21.4	2.74	0.31	0.1	4	3.15		III	10.9275	41.4364	46.9691	0.667063
2014-11-19 20:00:00	205	30.1	3.22	8.84	0	3	12.06
2014-11-20 08:00:00	244	34.6	2.86	2.82	0.07	3.2	5.75
2014-11-20 20:00:00	207	22.8	1.74	0	0	1.7	1.74
2014-12-08 08:00:00	31	3.1	0.56	0	0.12	1.4	0.68
2014-12-08 20:00:00	68	6.6	1	0	0	1.8	1
2014-12-09 08:00:00	154	21.6	4.44	0	0.18	5.2	4.62		IV	15.3046	46.6707	37.0288	0.995884
2014-12-09 20:00:00	260	34.6	4.97	8.16	0	3.4	13.13
2014-12-10 08:00:00	109	11.1	0.9	0.02	0.04	1.7	0.96
2014-12-10 20:00:00	16	1.5	0.26	0	0	0.8	0.26
2015-01-14 08:00:00	153	17.8	2.1	0.74	0.08	2.4	2.92		V	9.07354	48.94	41.0841	0.902364
2015-01-14 20:00:00	209	22.5	1.99	0.37	0	2.1	2.36
2015-01-15 08:00:00	271	32.6	3.38	0.09	0.09	3.1	3.56
2015-01-15 20:00:00	323	31.8	1.75	6.54	0	1.9	8.29
2015-01-16 08:00:00	21	3.3	0.22	0.02	0.06	1	0.3
2015-01-16 20:00:00	21	1.8	0.35	0	0	0.9	0.35

## Sheet: Data in fig05
Start time, LT	PM2.5 (μg/m3)	SO4 (μg/m3)	LWC (mg/m3)	Pcloud,S(IV)+O3 (μg/m3/h)	Pcloud,S(IV)+H2O2 (μg/m3/h)	Pcloud,S(IV)+NO2 (μg/m3/h)	Pcloud,S(IV)+O2 (μg/m3/h)	Δ17O(SO4) (Cloud,‰)	Δ17O(SO4) (‰)	SD
2014-10-18 08:00:00	86	10.8	0	0	0	0	0	0.76	1.2	0.2
2014-10-18 20:00:00	215	30.5	0.13	0	0.04	0	0	0.7	1.6	0.1
2014-10-19 08:00:00	228	37.8	0.88	0.01	0.43	0.04	0.03	0.67	1	0.1
2014-10-19 20:00:00	138	28.5	19.48	0.02	3.86	0.35	0.35	0.61	1.1	0.1
2014-10-20 08:00:00	177	35.8	0.01	0	0	0	0	0.7	1	0.1
2014-10-20 20:00:00	83	9.8	0	0	0	0	0	0.62	0.9	0.2
2014-10-21 08:00:00	45	4.6	0	0	0	0	0	0.62	0.8	0.2
2014-10-21 20:00:00	41	4.1	0	0	0	0	0	0.59	0.6	0
2014-10-22 08:00:00	62	6.6	0.63	0	0.17	0.01	0.02	0.6	0.9	0
2014-10-22 20:00:00	82	8.2	26.3	0.01	5.49	0.59	0.56	0.59	0.7	0.1
2014-10-23 08:00:00	122	23.9	4.13	0.01	1.23	0.09	0.11	0.66	1.1	0.3
2014-10-23 20:00:00	138	29	46.67	0.08	9.58	1.13	1.07	0.61	0.9	0.2
2014-10-24 08:00:00	214	51.7	1.83	0.01	0.47	0.04	0.04	0.7	1.4	0.4
2014-10-24 20:00:00	184	46.2	22.12	0.03	3.19	0.45	0.34	0.6	1.3	0.2
2014-10-25 08:00:00	257	56.4	1.32	0.01	0.24	0.02	0.02	0.7	1.1	0.1
2014-10-25 20:00:00	210	31.5	0.01	0	0	0	0	0.66	1.1	0.1
2014-11-17 20:00:00	24	2.5	0	0	0	0	0	0.58	1	0.3
2014-11-18 08:00:00	34	5	0	0	0	0	0	0.68	0.9	0.1
2014-11-19 08:00:00	174	21.4	0.34	0	0.24	0.04	0.03	0.56	0.8	0.2
2014-11-19 20:00:00	205	30.1	11.97	0.01	6.53	1.41	0.88	0.53	0.8	0.2
2014-11-20 08:00:00	244	34.6	4.23	0.01	2.12	0.43	0.26	0.55	0.8	0.2
2014-11-20 20:00:00	207	22.8	0	0	0	0	0	0.5	0.9	0.1
2014-12-08 08:00:00	31	3.1	0	0	0	0	0	0.65	0.9	0.2
2014-12-08 20:00:00	68	6.6	0	0	0	0	0	0.49	1	0.1
2014-12-09 08:00:00	154	21.6	0	0	0	0	0	0.5	0.3	0.1
2014-12-09 20:00:00	260	34.6	7.14	0.01	5.31	1.92	0.92	0.46	0.1	0.1
2014-12-10 08:00:00	109	11.1	0.07	0	0.02	0	0	0.65	0.3	0
2014-12-10 20:00:00	16	1.5	0	0	0	0	0	0.65	1	0.1
2015-01-14 08:00:00	153	17.8	0.87	0	0.53	0.11	0.09	0.52	0.7	0
2015-01-14 20:00:00	209	22.5	0.55	0	0.25	0.07	0.05	0.5	0.5	0.1
2015-01-15 08:00:00	271	32.6	0.09	0	0.06	0.02	0.01	0.5	0.6	0.1
2015-01-15 20:00:00	323	31.8	14.25	0.01	4.17	1.56	0.8	0.46	0.5	0.1
2015-01-16 08:00:00	21	3.3	0.09	0	0.01	0	0	0.71	0.8	0.2
2015-01-16 20:00:00	21	1.8	0	0	0	0	0	0.63	0.9	0.1

## Sheet: Data in fig06
Start time, LT	PM2.5 (μg/m3)	SO4 (μg/m3)	RH (%)	pH of filtrate	pH, stable	AWC (stable,μg/m3)	Is (M,stable)	pH, metastable	AWC (metastable,μg/m3)	Is (M, metastable)
2014-10-18 08:00:00	86	10.8	40	6.8
2014-10-18 20:00:00	215	30.5	70	4.6	7.5	108.2	19.7	3.9	113.3	19.6
2014-10-19 08:00:00	228	37.8	52	4.8	7.5	16.4	40.4	4	60.6	39.9
2014-10-19 20:00:00	138	28.5	72	4.7	7.6	104.7	18.1	3.9	106.1	17.9
2014-10-20 08:00:00	177	35.8	67	4.6	7.5	77.7	24.3	3.6	86.4	23.4
2014-10-20 20:00:00	83	9.8	49	5.7	7.7	0.9	51.6	4.9	9.2	46.1
2014-10-21 08:00:00	45	4.6	29	7.3
2014-10-21 20:00:00	41	4.1	58	7.3	7.5	16.3	17.5	7.5	16.3	17.5
2014-10-22 08:00:00	62	6.6	53	6.6	7.5	2.2	36.4	4.9	12.5	29.9
2014-10-22 20:00:00	82	8.2	61	5.9	7.8	12.5	23.2	4.7	24.1	23.2
2014-10-23 08:00:00	122	23.9	52	5	7.5	7.9	40.5	3.9	32.6	40.1
2014-10-23 20:00:00	138	29	75	4.9	7.6	107.9	16.1	4	109.8	16
2014-10-24 08:00:00	214	51.7	62	4.7	7.5	68.3	28.8	3.5	102	28.2
2014-10-24 20:00:00	184	46.2	78	4.6	7.6	196.1	14.2	3.7	198.1	14.1
2014-10-25 08:00:00	257	56.4	65	4.6	7.5	112.4	25.6	3.4	138.6	25.1
2014-10-25 20:00:00	210	31.5	65	5.2	7.5	52.9	25.8	3.8	72.1	25.1
2014-11-17 20:00:00	24	2.5	44	8.2	7.6	2.6	25.7	7.6	2.6	25.7
2014-11-18 08:00:00	34	5	27	7.3
2014-11-19 08:00:00	174	21.4	50	6.1	7.7	2.8	49	5.4	28	42.6
2014-11-19 20:00:00	205	30.1	68	4.9	7.7	72.9	19.8	4.7	105.8	19.8
2014-11-20 08:00:00	244	34.6	63	4.7	7.7	57.4	23.9	4.7	102.4	23.7
2014-11-20 20:00:00	207	22.8	78	4.8	7.7	119.2	12.7	4.7	123.8	12.8
2014-12-08 08:00:00	31	3.1	28	6.7
2014-12-08 20:00:00	68	6.6	46	6.8		0		6.1	7	44.1
2014-12-09 08:00:00	154	21.6	48	6.1	7.7	1	47.6	5.4	29.5	38.7
2014-12-09 20:00:00	260	34.6	80	4.8	7.8	149.2	11.3	4.9	164.7	11.4
2014-12-10 08:00:00	109	11.1	35	6.2
2014-12-10 20:00:00	16	1.5	32	5.8
2015-01-14 08:00:00	153	17.8	52	5	7.7	4.5	41	4.8	28.4	40.5
2015-01-14 20:00:00	209	22.5	61	4.8	7.7	17.9	29.6	4.8	47.1	29.2
2015-01-15 08:00:00	271	32.6	64	4.8	7.7	33.7	26.5	4.7	69.1	26.1
2015-01-15 20:00:00	323	31.8	75	4.7	7.8	73.6	16.6	4.8	100.8	16.5
2015-01-16 08:00:00	21	3.3	21	6.7
2015-01-16 20:00:00	21	1.8	32	6.1

## Sheet: Input for ISORROPIA II
Start time, LT	PM2.5 (μg/m3)	Na (μg/m3)	SO4 (μg/m3)	NH4 (μg/m3)	Calculated NH3 (nmol/mol)	NO3 (μg/m3)	Cl (μg/m3)	Ca (μg/m3)	K (μg/m3)	Mg (μg/m3)	RH	T (K)
2014-10-18 08:00:00	86	0.4	10.8	14.7	8.8	26.9	0.5	3.4	1.5	0.3	0.4	290.9
2014-10-18 20:00:00	215	0.9	30.5	31.7	14.2	80	3.4	1.2	3.7	0.2	0.7	285.1
2014-10-19 08:00:00	228	1	37.8	36	18	73.1	7.5	1.3	4.2	0.3	0.52	289.5
2014-10-19 20:00:00	138	0.4	28.5	29.2	13.5	57.7	5.1	0.6	3.3	0.2	0.72	285.7
2014-10-20 08:00:00	177	0.5	35.8	29.2	10.1	59.4	2.3	1.2	2.8	0.2	0.67	287.2
2014-10-20 20:00:00	83	0.6	9.8	15.3	12	16	2.4	2.4	2.4	0.3	0.49	284.8
2014-10-21 08:00:00	45	0.5	4.6	5.6	10.7	7.9	3	4.8	1.5	0.4	0.29	284.3
2014-10-21 20:00:00	41	0.3	4.1	5.1	9.7	8.6	2.1	5.5	1.3	0.2	0.58	279.6
2014-10-22 08:00:00	62	0.5	6.6	9.3	10.7	14.8	5.3	2.4	1.5	0.3	0.53	283.4
2014-10-22 20:00:00	82	0.4	8.2	13.5	12.9	16.4	5.6	1.5	1.5	0.2	0.61	283.2
2014-10-23 08:00:00	122	0.5	23.9	22.4	10.7	37.4	3.5	1.5	1.8	0.2	0.52	285.7
2014-10-23 20:00:00	138	0.5	29	26.7	12	55.1	2.5	1.2	1.8	0.2	0.75	281
2014-10-24 08:00:00	214	0.6	51.7	35.9	13.8	80.8	4	1.4	2.3	0.3	0.62	286.4
2014-10-24 20:00:00	184	0.5	46.2	34.9	15.3	82.1	2.9	0.2	2	0	0.78	282
2014-10-25 08:00:00	257	0.7	56.4	42.5	15.7	106.7	4	0.7	2.7	0.1	0.65	287
2014-10-25 20:00:00	210	0.7	31.5	27.8	8.7	59.6	1.2	1.9	1.7	0.2	0.65	284.2
2014-11-17 20:00:00	24	0.1	2.5	0	7.3	2.5	0.2	5.6	0.2	0.1	0.44	274.3
2014-11-18 08:00:00	34	0.2	5	2.9	5.3	7.2	0.4	6.2	5.9	0.3	0.27	282.2
2014-11-19 08:00:00	174	0.8	21.4	27.7	14.9	39.6	9.3	4.7	7.3	0.6	0.5	279.3
2014-11-19 20:00:00	205	0.9	30.1	38.2	15.5	55.4	11.9	0.8	3.6	0.1	0.68	276.8
2014-11-20 08:00:00	244	1.1	34.6	43	16.8	65	15	1.3	3.9	0.2	0.63	278.8
2014-11-20 20:00:00	207	0.7	22.8	32.5	17.4	42	7.7	0.2	2.9	0.1	0.78	275.2
2014-12-08 08:00:00	31	0.1	3.1	3.2	4.9	4	0.5	2.3	0.3	0.2	0.28	273.5
2014-12-08 20:00:00	68	0.4	6.6	10	10.5	13.8	2.9	2.6	1.6	0.2	0.46	268.9
2014-12-09 08:00:00	154	1.2	21.6	25.3	13.6	22.8	11.1	2.7	2.6	0.3	0.48	271.9
2014-12-09 20:00:00	260	1.2	34.6	33.8	16.2	26.4	15	0.5	3.4	0.1	0.8	271
2014-12-10 08:00:00	109	0.5	11.1	11	5.7	7.7	3	2.3	3.2	0.4	0.35	274
2014-12-10 20:00:00	16	0	1.5	0.1	3.6	0.3	0	0.5	0.4	0	0.32	269.1
2015-01-14 08:00:00	153	0.5	17.8	23.2	10.2	32.5	2.8	0	1.7	0.1	0.52	271.3
2015-01-14 20:00:00	209	0.7	22.5	27.1	10.6	40.4	2.3	0.4	2.4	0.1	0.61	269.3
2015-01-15 08:00:00	271	0.8	32.6	34.6	13	43.7	4.1	0.2	3.5	0.1	0.64	271.7
2015-01-15 20:00:00	323	0.9	31.8	30.8	14.3	34.8	4.7	0.2	3.2	0.1	0.75	268.9
2015-01-16 08:00:00	21	0.2	3.3	0.3	2.1	0.9	0.2	2.5	2	0.1	0.21	273.5
2015-01-16 20:00:00	21	0	1.8	0	4.4	0.7	0	0.8	0.1	0	0.32	268.7
