# Supplementary material for: Isotopic constraints on heterogeneous sulfate production in Beijing haze
Source: Copernicus journal article supplement (doi:10.5194/acp-18-5515-2018), 2018-04-23
Supplement: Supplementary file 1 [file acp-18-5515-2018-supplement.zip › Supplementary Information.docx]

**Table S1.** Reaction rate expression and constant for SO2 oxidation by OH in the gas-phase.

| Oxidant | The reaction rate expression and constant a | References |
| --- | --- | --- |
| OH | *R*SO2+OH = *k*0[SO2(g)][OH(g)]  *k*0low = 3.3×10–31×(*T*/300K)–4.3 cm6 s–1  *k*0high = 1.6×10–12 cm3 s–1  *F*c = 0.6 | (Burkholder et al., 2015) |

a We report the low and high pressure limit of *k* for SO2 oxidation by OH. *F*c is used to calculate the dependence of *k* on pressure and temperature (details see the reference (Burkholder et al., 2015)).

**Table S2.** The daytime average OH concentration.

| Cases a | Daytime OH concentration (×106 cm–3) b | References |
| --- | --- | --- |
| PD of Case I and II | 3.5 | (Rao et al., 2016) |
| NPD of Case I and II | 4.9 |
| PD of Case III to V | 0.34 |
| NPD of Case III to V | 0.99 |

a PD refers to polluted days (PM2.5 ≥ 75 μg m–3), NPD refers to non-polluted days (PM2.5 < 75 μg m–3).

b The daytime (08:00–20:00 LT) OH concentration in PD of Case I and II in October 2014 was taken from the value reported in summer haze in Beijing, and the daytime OH concentration in NPD of Case I and II was taken from the value reported in summer non-haze in Beijing (Rao et al., 2016). The daytime OH concentration in PD of Case III to V in November 2014 to January 2015 was taken from the value reported in winter haze in Beijing, and the daytime OH concentration in NPD of Case III to V was taken from the value reported in winter non-haze in Beijing (Rao et al., 2016).

**Table S3.** Aqueous-phase reaction rate expressions, rate constants (*k*) and influence of ionic strength (*I*s) on *k* for sulfate production in aerosol and cloud water.

| Oxidants | The reaction rate expressions (*R*S(IV)+oxi), constants (*k*) and influence of *I*s (in unit of M) on *k* a | Notes | References |
| --- | --- | --- | --- |
| O3 | (*k*1[H2SO3]+*k*2[HSO3–]+*k*3[SO32–])[O3(aq)]  *k*1 = 2.4×104 M–1 s–1  *k*2 = 3.7×105×e(–5530×(1/*T*–1/298)) M–1 s–1  *k*3 = 1.5×109×e(–5280×(1/*T*–1/298)) M–1 s–1 |  | (Hoffmann and Calvert, 1985) |
| *b*1 is in range of 0.7 to 1.3 b | *I*s, max = 0.94 M | (Maahs, 1983) |
| *b*2 is in range of 0.8 to 3.7 b | *I*s, max = 1.2 M | (Lagrange et al., 1994) |
| H2O2 | *k*4[H+][HSO3–][H2O2(aq)]/(1+*K*[H+])  *k*4 = 7.45×107×e(–4430×(1/*T*–1/298)) M–1 s–1  *K* = 13 M–1 |  | (McArdle and Hoffmann, 1983) |
|  | *I*s, max = 5 M | (Maaß et al., 1999) |
| NO2 | *k*5[S(IV)][NO2(aq)] c  *k*5low = 2×106 M–1 s–1  *k*5high = (1.24–2.95)×107 M–1 s–1 |  | (Clifton et al., 1988; Lee and Schwartz, 1982) |
| *b*3 > 0 d | Theoretical prediction | (Cheng et al., 2016) |
| O2 e | *k*6[H+]–0.74[S(IV)][Mn(II)][Fe(III)] (pH ≤ 4.2)  *k*6 = 3.72×107×e(–8431.6×(1/*T*–1/297)) M–2 s–1  *k*7[H+]0.67[S(IV)][Mn(II)][Fe(III)] (pH > 4.2)  *k*7 = 2.51×1013×e(–8431.6×(1/*T*–1/297)) M–2 s–1 |  | (Ibusuki and Takeuchi, 1987) |
|  | *b*4 is in range of –4 to –2 | *I*s, max = 2 M | (Martin and Hill, 1967; Martin et al., 1991) |
|  | *k*8 = 1.5×106[S(IV)] (M s–1, pH ≤ 3, microdroplets) f |  | (Hung and Hoffmann, 2015) |

a The influence of *I*s was not considered for in-cloud calculation due to the estimated *I*s of cloud water being negligible (around 3×10–3 M) in North China Plain (NCP) (Guo et al., 2012; Wang et al., 2011). The cloud pH was set to be 4.6 in the present study, which is the mean value observed in NCP with typical range of 3–5 (Guo et al., 2012; Shen et al., 2012; Wang et al., 2011).

b The values of *b*1 and *b*2 are different for different solutions (Maahs, 1983; Lagrange et al., 1994). Since these values vary largely and have a significant impact on the estimated reaction rate at high *I*s in aerosol water, the relative importance of heterogeneous sulfate production via S(IV) + O3 in aerosol water was not estimated by chemical reaction kinetics calculation but estimated with the constraint of *Δ*17O(SO42–).

c The *k*5low was taken from Lee and Schwartz (1982). They reported a lower-limit value of *k*5low= 2×106 M–1 s–1 at pH of 5.8 and 6.4. The *k*5highis in the pH range of 5.3–13 as reported by Clifton et al. (1988) and it increases with increasing pH. We used the value *k*5high= 1.24×107 M–1 s–1 for pH < 5.3, and *k*5high= (0.1239pH+0.5954)×107 M–1 s–1 derived from Clifton et al. (1988) for pH in 5.3–7.8 in this study.

d The *b*3 was predicted theoretically to be positive (Cheng et al., 2016), however, no specific value of *b*3 was determined from laboratory work. Thus we didn’t consider the influence of *I*s on S(IV) + NO2 in aerosol water in our calculation, which is consistent with Cheng et al., (2016).

e S(IV) oxidation by O2, which is via a radical chain mechanism, can be initiated by transition metal ions (TMIs) in bulk water (*k*6 and *k*7) or initiated on acidic microdroplets (*k*8). Thus in our calculation, the reaction rate *k*6 and *k*7 was used for in-cloud sulfate production via S(IV) + O2, while *k*8 was used for heterogeneous sulfate production.

f This mechanism is not well studied so far, e.g., the influence of *I*s on *k*8 remains unknown, and the value of *k*8 is not reported when pH is > 3 even though it decreases with increasing pH when pH is > 3 (Hung and Hoffmann, 2015). To be not speculative, this mechanism was used at pH ≤ 3 with *I*s being not considered.

**Table S4.** Summary for the input and output of ISORROPIA II model.

|  | Non-polluted days | | Polluted days | | Total | |
| --- | --- | --- | --- | --- | --- | --- |
| mean | range | mean | range | mean | range |
| Observed inorganic ion concentrations (μg m–3) | | | | | | |
| SO42– | 3.9±1.8 | 1.5–6.6 | 28.4±12.5 | 8.2–56.4 | 21.2±15.4 | 1.5–56.4 |
| NO3– | 6.1±5.3 | 0.3–14.8 | 48.4±24.7 | 7.7–106.7 | 35.9±28.5 | 0.3–106.7 |
| NH4+ | 3.6±3.8 | 0.0–10.0 | 28.6±8.7 | 11.0–43.0 | 21.3±13.8 | 0.0–43.0 |
| Cl– | 1.5±1.8 | 0.0–5.3 | 5.5±4.1 | 0.5–15.0 | 4.3±4.0 | 0.0–15.0 |
| K+ | 1.5±1.7 | 0.1–5.9 | 2.9±1.2 | 1.5–7.3 | 2.5±1.5 | 0.1–7.3 |
| Na+ | 0.2±0.2 | 0.0–0.5 | 0.7±0.2 | 0.4–1.2 | 0.6±0.3 | 0.0–1.2 |
| Ca2+ | 3.3±2.0 | 0.5–6.2 | 1.3±1.1 | 0.0–4.7 | 1.9±1.7 | 0.0–6.2 |
| Mg2+ | 0.2±0.1 | 0.0–0.4 | 0.2±0.1 | 0.0–0.6 | 0.2±0.1 | 0.0–0.6 |
| Calculated NH3 (nmol mol–1) | 6.9±3.3 | 2.1–10.7 | 13.1±3.1 | 5.7–18.0 | 11.3±4.2 | 2.1–18.0 |
| Observed meteorological parameters a | | | | | | |
| Temperature (°C) | 2.6±6.2 | –4.5–11.1 | 6.8±6.9 | –4.3–17.7 | 5.6±6.9 | –4.5–17.7 |
| Relative humidity (%) | 37±12 | 21–58 | 62±12 | 35–80 | 54±17 | 21–80 |
| Modelled aerosol parameters | | | | | | |
| Stable mode | | | | | | |
| AWC (μg m–3) | 5.3±7.4 | 0.0–16.3 | 63.5±54.6 | 0.9–196.1 | 54.6±54.5 | 0.0–196.1 |
| Aerosol pH | 7.5±0.1 | 7.5–7.6 | 7.6±0.1 | 7.5–7.8 | 7.6±0.1 | 7.5–7.8 |
| *I*s (M) | 26.5±9.5 | 17.5–36.4 | 27.6±12.2 | 11.3–51.6 | 27.4±11.8 | 11.3–51.6 |
| Metastable mode | | | | | | |
| AWC (μg m–3) | 9.6±6.0 | 2.6–16.3 | 84.2±49.2 | 9.2–198.1 | 72.7±52.8 | 2.6–198.1 |
| Aerosol pH | 6.5±1.3 | 4.9–7.6 | 4.4±0.6 | 3.4–5.4 | 4.7±1.1 | 3.4–7.6 |
| *I*s (M) | 29.3±11.2 | 17.5–44.1 | 26.4±10.6 | 11.4–46.1 | 26.8±10.5 | 11.4–46.1 |

a Data used here are 12h-averaged values, corresponding with filter samples. And samples with relative humidity < 40 % were not analysed for aerosol liquid water content (AWC), aerosol pH and ionic strength (*I*s) due to that ISORROPIA II underestimates AWC at low relative humidity (Bian et al., 2014).

**Table S5.** Calculations of aqueous-phase concentrations, equilibrium constants and influence of ionic strength.

| Gas species | Aqueous concentration expressions, constants  and the influence of *I*s a | Notes | References |
| --- | --- | --- | --- |
| SO2 |  |  | (Seinfeld and Pandis, 2006) |
|  | *I*s, max = 6 M | (Millero et al., 1989) |
| O3 |  | *I*s, max = 0.6 M | (Kosak-Channing and Helz, 1983) |
| H2O2 b |  |  | (Seinfeld and Pandis, 2006; Chung et al., 2005) |
|  |  | [(NH4)2SO4]max = 4M  [NH4NO3]max = 10M  [NH4Cl]max = 4M | (Chung et al., 2005) |
| NO2 c |  |  | (Seinfeld and Pandis, 2006) |

a The influence of *I*s was not considered for in-cloud calculation due to the estimated *I*s of cloud water being negligible (around 3×10–3 M) in North China Plain (NCP) (Guo et al., 2012; Wang et al., 2011). The cloud pH was set to be 4.6 in the present study, which is the mean value observed in NCP with typical range of 3–5 (Guo et al., 2012; Shen et al., 2012; Wang et al., 2011).

b Different salt solutions were found to have different effects on *H*H2O2, the reported relationships between *H*H2O2 and different salts ((NH4)2SO4, NH4NO3 and NH4Cl) were measured at 292K (Chung et al., 2005). In the mixture of salt solutions, *H*H2O2 can be estimated as: *H*(mixture) = *HI*s=0 + (*H*(Salt 1)–*HI*s=0) + (*H*(Salt 2)–*HI*s=0) + (*H*(Salt 3)–*HI*s=0) (Chung et al., 2005).

c We didn’t consider the influence of *I*s on *H*NO2 in our calculation due to the lack of relevant laboratory data.

**Table S6.** Observed *Δ*17O(SO42–) in aerosols or rainwater in mid-latitude areas.

| *Δ*17O(SO42–) range (‰) | Sample | Locations | Time | References |
| --- | --- | --- | --- | --- |
| 0.1–1.6 (0.9±0.3) | Aerosol | Beijing, China | October 2014 to January 2015 | This study |
| 1.24±0.15 | Aerosol | Mount Wuyi, China | March 2014 to February 2015 | (Lin et al., 2017) |
| 0.47–1.50 (0.92) | Aerosol | La Jolla, USA | February 2009 to August 2010 | (Hill‐Falkenthal et al., 2012) |
| 1.19–3.00 | Aerosol | Bakersfield, USA | December 1998 to January 1999 | (Romero and Thiemens, 2003) |
| 1.0–1.6 | Aerosol | Mount Barcroft, USA | August 1996 to March 1997 | (Lee and Thiemens, 2001) |
| 0.2–1.6 | Aerosol | La Jolla, USA | May 1996 to December 1997 | (Lee and Thiemens, 2001) |
| 0.14–1.02 (0.53±0.19) | Rainwater | Wuhan, China | April 2009 to September 2011 | (Li et al., 2013) |
| 0.26–1.43 (0.62±0.32) | Rainwater | Baton Rouge, USA | August 2003 to March 2005 | (Jenkins and Bao, 2006) |
| 0.2–1.4 | Rainwater | La Jolla, USA | November 1997 to February 1998 | (Lee and Thiemens, 2001) |
| 0.02–4.23 (1.0±0.6) | Aerosol, dust, rainwater | Southwestern USA | November 1998 to April 1999 | (Bao and Reheis, 2003) |
| 0.80–1.62 (1.30) | Snowpack | The Rocky Mountains, USA | 1994 to 2000 | (Johnson et al., 2001) |

References

Bao, H., and Reheis, M. C.: Multiple oxygen and sulfur isotopic analyses on water‐soluble sulfate in bulk atmospheric deposition from the southwestern United States, J. Geophys. Res., 108, 2003.

Bian, Y., Zhao, C., Ma, N., Chen, J., and Xu, W.: A study of aerosol liquid water content based on hygroscopicity measurements at high relative humidity in the North China Plain, Atmos. Chem. Phys., 14, 6417-6426, 2014.

Burkholder, J., Sander, S., Abbatt, J., Barker, J., Huie, R., Kolb, C., Kurylo, M., Orkin, V., Wilmouth, D., and Wine, P.: Chemical Kinetics and Photochemical Data for Use in Atmospheric Studies: Evaluation Number 18, Pasadena, CA: Jet Propulsion Laboratory, National Aeronautics and Space Administration, 2015, 2015.

Cheng, Y., Zheng, G., Wei, C., Mu, Q., Zheng, B., Wang, Z., Gao, M., Zhang, Q., He, K., and Carmichael, G.: Reactive nitrogen chemistry in aerosol water as a source of sulfate during haze events in China, Sci. Adv., 2, e1601530, 2016.

Chung, M., Muthana, S., Paluyo, R., and Hasson, A.: Measurements of effective Henry's law constants for hydrogen peroxide in concentrated salt solutions, Atmos. Environ., 39, 2981-2989, 2005.

Clifton, C. L., Altstein, N., and Huie, R. E.: Rate constant for the reaction of nitrogen dioxide with sulfur (IV) over the pH range 5.3-13, Environ. Sci. Technol., 22, 586-589, 1988.

Guo, J., Wang, Y., Shen, X., Wang, Z., Lee, T., Wang, X., Li, P., Sun, M., Collett, J. L., and Wang, W.: Characterization of cloud water chemistry at Mount Tai, China: Seasonal variation, anthropogenic impact, and cloud processing, Atmos. Environ., 60, 467-476, 2012.

Hill‐Falkenthal, J., Priyadarshi, A., and Thiemens, M.: Differentiating sulfate aerosol oxidation pathways for varying source altitudes using 35S and Δ17O tracers, J. Geophys. Res., 117, D18302, 2012.

Hoffmann, M. R., and Calvert, J. G.: Chemical Transformation Modules for Eulerian Acid Deposition Models: Volume II, the Aqueous-phase Chemistry, Atmospheric Sciences Research Laboratory, Office of Research and Development, US Environmental Protection Agency, 1985.

Hung, H.-M., and Hoffmann, M. R.: Oxidation of gas-Phase SO2 on the surfaces of acidic microdroplets: Implications for sulfate and sulfate radical anion formation in the atmospheric liquid phase, Environ. Sci. Technol., 49, 13768-13776, 2015.

Ibusuki, T., and Takeuchi, K.: Sulfur dioxide oxidation by oxygen catalyzed by mixtures of manganese (II) and iron (III) in aqueous solutions at environmental reaction conditions, Atmos. Environ., 21, 1555-1560, 1987.

Jenkins, K. A., and Bao, H.: Multiple oxygen and sulfur isotope compositions of atmospheric sulfate in Baton Rouge, LA, USA, Atmos. Environ., 40, 4528-4537, 2006.

Johnson, C. A., Mast, M. A., and Kester, C. L.: Use of 17O/16O to trace atmospherically‐deposited sulfate in surface waters: A case study in Alpine watersheds in the Rocky Mountains, Geophys. Res. Lett., 28, 4483-4486, 2001.

Kosak-Channing, L. F., and Helz, G. R.: Solubility of ozone in aqueous solutions of 0-0.6 M ionic strength at 5-30 °C, Environ. Sci. Technol., 17, 145-149, 1983.

Lagrange, J., Pallares, C., and Lagrange, P.: Electrolyte effects on aqueous atmospheric oxidation of sulphur dioxide by ozone, J. Geophys. Res., 99, 14595-14600, 1994.

Lee, C. C. W., and Thiemens, M. H.: The δ17O and δ18O measurements of atmospheric sulfate from a coastal and high alpine region: A mass‐independent isotopic anomaly, J. Geophys. Res., 106, 17359-17373, 2001.

Lee, Y. N., and Schwartz, S. E.: Kinetics of oxidation of aqueous sulfur (IV) by nitrogen dioxide, in: Kinetics of oxidation of aqueous sulfur (IV) by nitrogen dioxide, Precipitation scavenging, dry Deposition and resuspension, California, 1982, 453-470, 1983.

Li, X., Bao, H., Gan, Y., Zhou, A., and Liu, Y.: Multiple oxygen and sulfur isotope compositions of secondary atmospheric sulfate in a mega-city in central China, Atmos. Environ., 81, 591-599, 2013.

Lin, M., Biglari, S., Zhang, Z., Crocker, D., Tao, J., Su, B., Liu, L., and Thiemens, M. H.: Vertically uniform formation pathways of tropospheric sulfate aerosols in East China detected from triple stable oxygen and radiogenic sulfur isotopes, Geophys. Res. Lett., 2017.

Maaß, F., Elias, H., and Wannowius, K. J.: Kinetics of the oxidation of hydrogen sulfite by hydrogen peroxide in aqueous solution:: ionic strength effects and temperature dependence, Atmos. Environ., 33, 4413-4419, 1999.

Maahs, H. G.: Kinetics and mechanism of the oxidation of S (IV) by ozone in aqueous solution with particular reference to SO2 conversion in nonurban tropospheric clouds, J. Geophys. Res., 88, 10721-10732, 1983.

Martin, L., Hill, M., Tai, A., and Good, T.: The iron catalyzed oxidation of sulfur (IV) in aqueous solution: differing effects of organics at high and low pH, J. Geophys. Res., 96, 3085-3097, 1991.

Martin, L. R., and Hill, M. W.: The iron catalyzed oxidation of sulfur: Reconciliation of the literature rates, Atmos. Environ., 21, 1487-1490, 1967.

McArdle, J. V., and Hoffmann, M. R.: Kinetics and mechanism of the oxidation of aquated sulfur dioxide by hydrogen peroxide at low pH, J. Phys. Chem., 87, 5425-5429, 1983.

Millero, F. J., Hershey, J. B., Johnson, G., and Zhang, J.-Z.: The solubility of SO2 and the dissociation of H2SO3 in NaCl solutions, J. Atmos. Chem., 8, 377-389, 1989.

Rao, Z., Chen, Z., Liang, H., Huang, L., and Huang, D.: Carbonyl compounds over urban Beijing: Concentrations on haze and non-haze days and effects on radical chemistry, Atmos. Environ., 124, 207-216, 2016.

Romero, A. B., and Thiemens, M. H.: Mass‐independent sulfur isotopic compositions in present‐day sulfate aerosols, J. Geophys. Res., 108, 4524, 2003.

Seinfeld, J. H., and Pandis, S. N.: Atmospheric chemistry and physics: From air pollution to climate change, John Wiley & Sons, New Jersey, 2006.

Shen, X., Lee, T., Guo, J., Wang, X., Li, P., Xu, P., Wang, Y., Ren, Y., Wang, W., and Wang, T.: Aqueous phase sulfate production in clouds in eastern China, Atmos. Environ., 62, 502-511, 2012.

Wang, Y., Guo, J., Wang, T., Ding, A., Gao, J., Zhou, Y., Collett, J. L., and Wang, W.: Influence of regional pollution and sandstorms on the chemical composition of cloud/fog at the summit of Mt. Taishan in northern China, Atmos. Res., 99, 434-442, 2011.
